# Supplementary material for: A rapid analysis of antioxidants in Sanghuangporus baumii by online extraction-HPLC-ABTS
Source: Royal Society of Chemistry journal article supplement (doi:10.1039/d1ra04300e), 2021-01-01
Supplement: d1ra04300e1.pdf [file d1ra04300e1.pdf]

## **Rapid analysis of antioxidants in *Sanghuangporus baumii* by online extraction-HPLC-ABTS**

Qian-hui Shen<sup>1,2</sup>, Qi Huang<sup>2</sup>, Juying Xie<sup>3</sup>, Kun Wang<sup>4</sup>, Zheng-ming Qian<sup>2,3\*</sup>, De-qiang Li<sup>5\*</sup>

1. Guangdong Institute for Drug Control, NMPA Key Laboratory for Rapid Testing Technology of Drugs, Guangzhou 510663, Guangdong province, China
2. Key Laboratory of State Administration of Traditional Chinese Medicine, Dongguan HEC Cordyceps R&D Co.,Ltd, Dongguan 523850, Guangdong province, China
3. School of Rehabilitation, Xiangnan University, Chenzhou 423000, Hunan province, China.
4. Jinzhai Shangzhen Biotechnology Co., Ltd., Liuan 237300, Anhui Province, China.
5. Department of Pharmacy, the Second Hospital of Hebei Medical University, Shijiazhuang 050000, Hebei province, China

\* Correspondence to:

De-qiang Li, deqli@163.com, Department of Pharmacy, the Second Hospital of Hebei Medical University, No.215, Heping West Road, Shijiazhuang 050000, Hebei province, China.

Zheng-ming Qian, qianzhengming1982@126.com, Key Laboratory of State Administration of Traditional Chinese Medicine, Dongguan HEC Cordyceps R&D Co.,Ltd, No.368, Zhen'an Middle Road, Chang'an Town, Dongguan 523850, Guangdong province, China

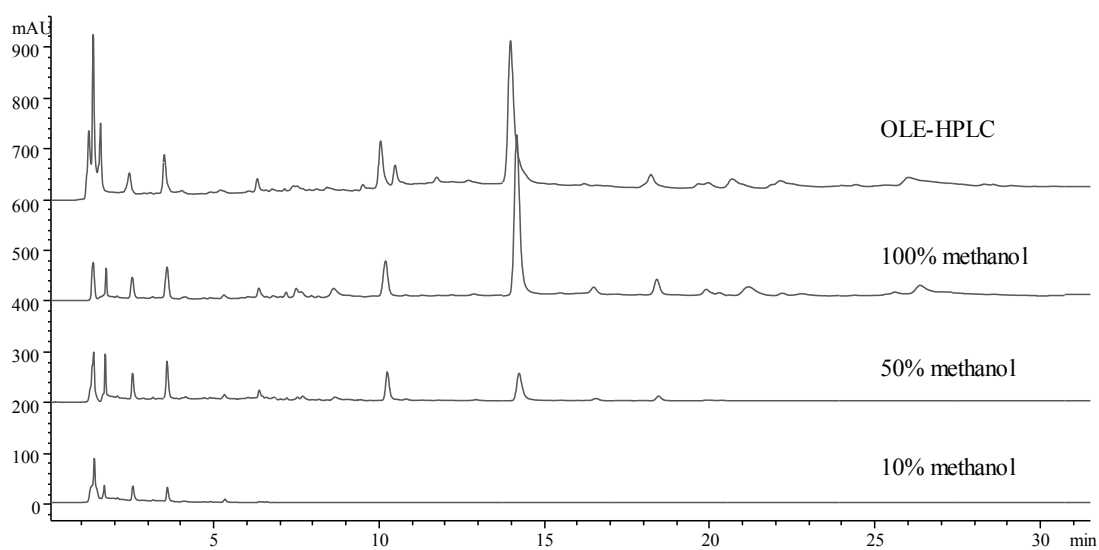

**Fig. S1** The powder of *S. baumii* sample was respectively extracted by different concentration of methanol and OLE-HPLC system.

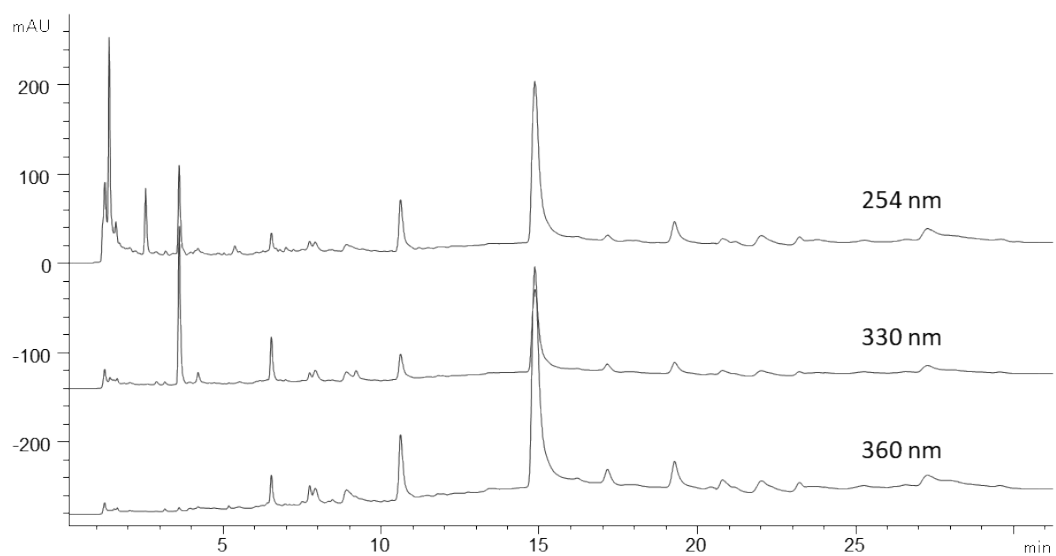

**Fig. S2** The OLE-HPLC analysis of *S. baumii* was detected by various wavelengths. The chromatogram shown that it is acquired at 254, 330, 360 nm, successively.

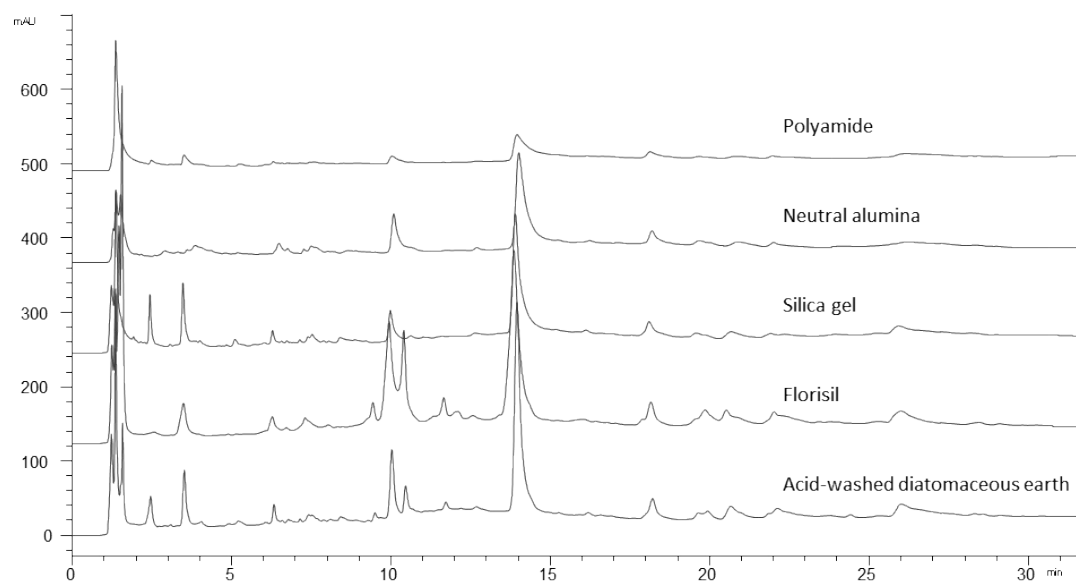

**Fig. S3** Optimization of the types of dispersant mixed with sample
